# Supplementary material for: Brown adipose tissue monocytes support tissue expansion
Source: PubMed Central journal article supplement (PMC8421389; doi:10.1038/s41467-021-25616-1), 2021-09-06
Supplement: 41467_2021_25616_MOESM1_ESM.pdf [file 41467_2021_25616_MOESM1_ESM.pdf]

Supplementary information for :

## **Brown adipose tissue monocytes support tissue expansion.**

### **Authors**

Alexandre Gallerand<sup>1£</sup>, Marion I. Stunault<sup>1£</sup>, Johanna Merlin<sup>1</sup>, Hannah P. Luehmann<sup>2</sup>, Deborah H. Sultan<sup>2</sup>, Maria M. Firulyova<sup>3</sup>, Virginie Magnone<sup>4</sup>, Narges Khedher<sup>1</sup>, Antoine Jalil<sup>5</sup>, Bastien Dolfi<sup>1</sup>, Alexia Castiglione<sup>1</sup>, Adeline Dumont<sup>1</sup>, Marion Ayrault<sup>1</sup>, Nathalie Vaillant<sup>1</sup>, Jérôme Gilleron<sup>1</sup>, Pascal Barbry<sup>4</sup>, David Dombrowicz<sup>6</sup>, Matthias Mack<sup>7</sup>, David Masson<sup>5</sup>, Thomas Bertero<sup>4</sup>, Burkhard Becher<sup>8</sup>, Jesse W. Williams<sup>9</sup>, Konstantin Zaitsev<sup>3</sup>, Yongjian Liu<sup>2</sup>, Rodolphe R. Guinamard<sup>1</sup>, Laurent Yvan-Charvet<sup>1</sup> and Stoyan Ivanov<sup>1\*</sup>

### **Affiliations**

<sup>1</sup> Université Côte d'Azur, INSERM, C3M, Nice, France.

<sup>2</sup> Department of Radiology, Washington University School of Medicine, Saint Louis, Missouri 63110 United States.

<sup>3</sup> Computer Technologies Department, ITMO University, Saint Petersburg, Russia.

<sup>4</sup> Université Côte d'Azur, CNRS, IPMC, Valbonne, France.

<sup>5</sup> Université Bourgogne Franche-Comté, LNC UMR1231, F-21000 Dijon, France.

<sup>6</sup> Univ.Lille, Inserm, CHU Lille, Institut Pasteur de Lille, U1011-EGID, 59000 Lille, France.

<sup>7</sup> Department of Internal Medicine - Nephrology, University Hospital Regensburg, Regensburg, Germany.

<sup>8</sup> Institute of Experimental Immunology, University of Zürich, Switzerland.

<sup>9</sup> Department of Integrative Biology and Physiology, Center for Immunology, University of Minnesota Medical School, Minneapolis, MN, USA.

£Equal contribution

\*Corresponding author

**Correspondence to:**

Stoyan.ivanov@unice.fr

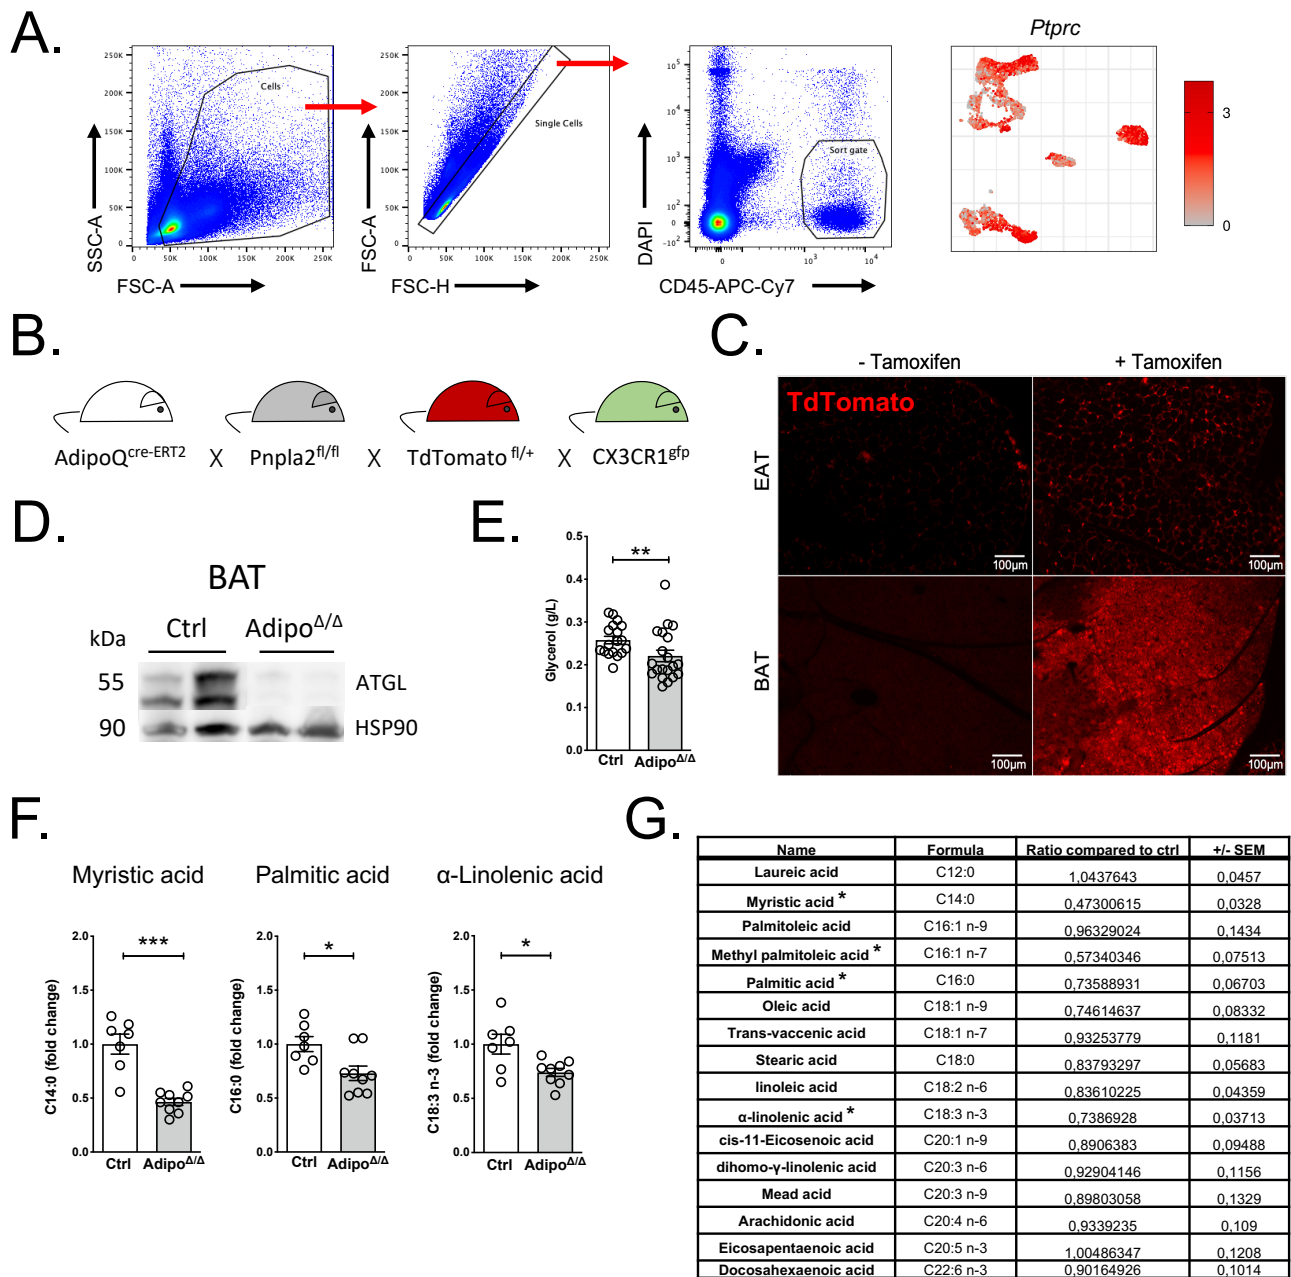

**Figure S1. This figure is related to Figure 1.**

(A) (Left) Cell-sorting strategy used for isolation of BAT CD45<sup>+</sup> cells before scRNA-Seq and (right) Single Cell RNA-Seq analysis of *Ptpcr* expression among BAT CD45<sup>+</sup> cells (B) Breeding scheme for generating Adipo<sup>Δ/Δ</sup> mice. (C) TdTomato reporter expression (red) in epididymal (EAT) and brown (BAT) adipose tissues by fluorescence microscopy. (D) ATGL protein expression in Adipo<sup>Δ/Δ</sup> mice brown adipose tissue (BAT) compared to controls (Ctrl) by Western Blot analysis; HSP90 was used as loading control for protein expression. (E) Glycerol levels in control (n=18) and Adipo<sup>Δ/Δ</sup> (n=20) mice sera. *p* = 0,0096. (F) Myristic acid (C14:0), palmitic acid (C16:0) and α-linolenic acid (C18:3 n-3) levels in control (n=7) and Adipo<sup>Δ/Δ</sup> (n=9) mice sera. *p* = 0,0003 (left), *p* = 0,0115 (middle), *p* = 0,0418 (right). (G) Lipidomic analysis of serum from control and Adipo<sup>Δ/Δ</sup> mice. Data are represented in ratio compared to Ctrl condition ± SEM. Stars indicate a statistically significant difference between controls and Adipo<sup>Δ/Δ</sup> mice (*p* < 0,05).

Panel C is representative of 3 experiments. Panel D represents one experiment. Panel E represents pooled data from 5 independent experiments. Panels F and G represent pooled data from 2 independent experiments. All data are represented in means ± SEM. Two-tailed Mann Whitney tests were used to determine statistical significance in panels E and F. ns *p* > 0,05 ; \* *p* < 0,05 ; \*\* *p* < 0,01 ; \*\*\* *p* < 0,001 ; \*\*\*\* *p* < 0,0001. Source data, and notably uncropped blots for panel S1D, are provided as a Source Data file.

**A.**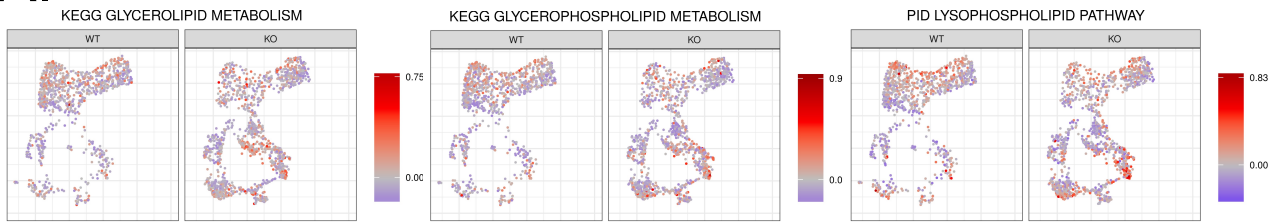**B.**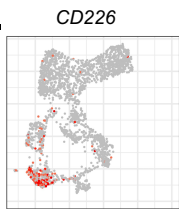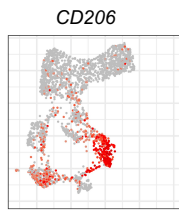**C.**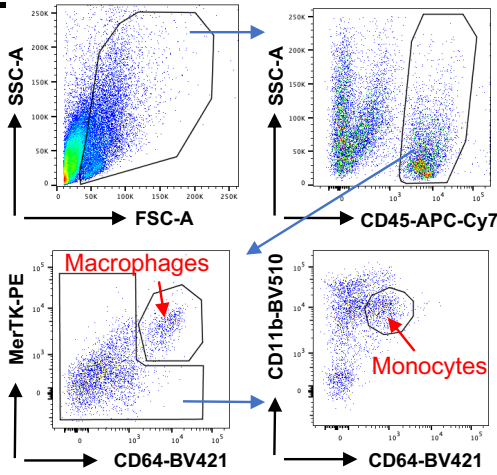**D.**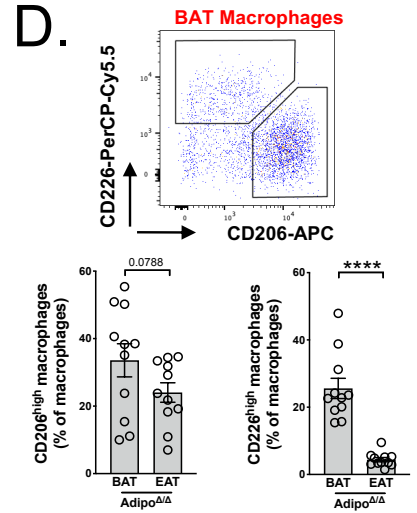**E.**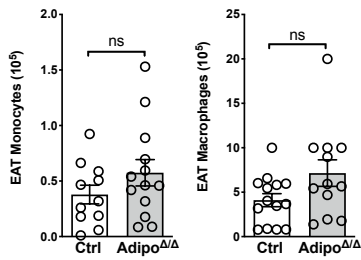**F.**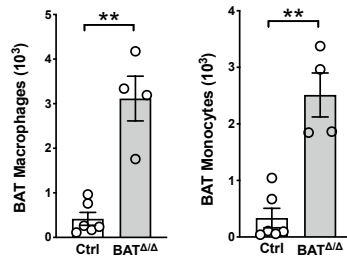**G.**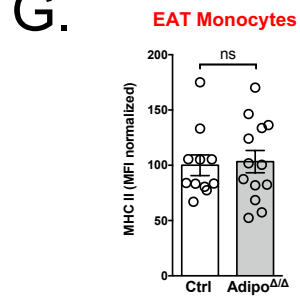**H.**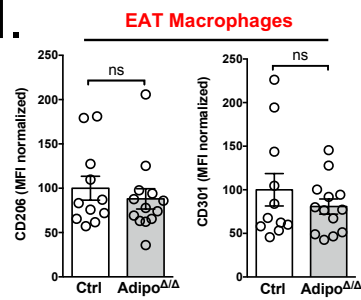**I.**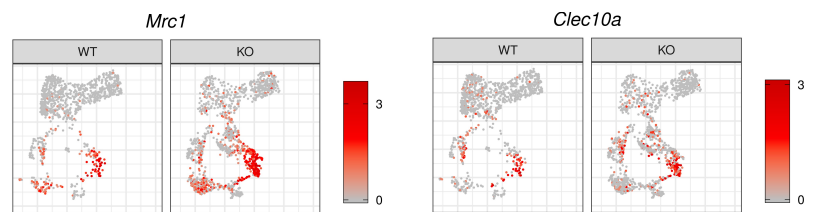**J.**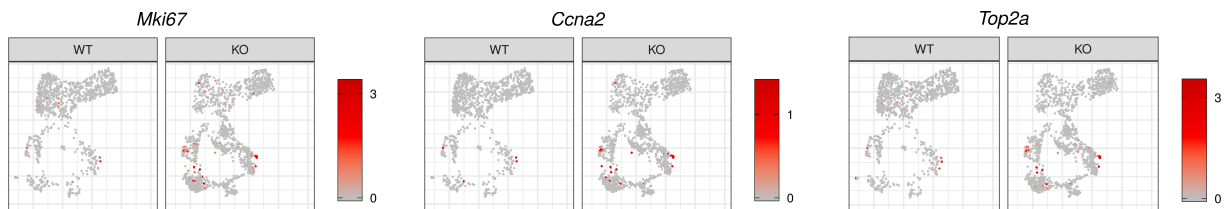

**Figure S2. This figure is related to Figure 2.**

(A) Single Cell RNA-Seq analysis of the PID “lysophospholipid metabolism” pathway, the KEGG “glycerolipid metabolism” gene set and the KEGG “glycerophospholipid metabolism” gene set expression. (B) Single Cell RNA-Seq analysis of *Mrc1* and *CD226* expression among BAT monocytes and macrophages. (C) Gating strategy used for identification of tissue macrophages, and tissue monocytes in mice lacking the *CX3CR1<sup>gfp</sup>* reporter. (D) Representative dot plots (left) and proportions (right) of BAT and EAT CD206<sup>high</sup> and CD226<sup>high</sup> macrophages in Adipo<sup>ΔΔ</sup> mice (n=11).  $p=0,0788$  (left),  $p<0,0001$  (right). (E) Quantification of EAT macrophage and monocyte counts in control (n=11) and Adipo<sup>ΔΔ</sup> (n=16) mice using flow cytometry.  $p=0,3607$  (left),  $p=0,1207$  (right). (F) Quantification of BAT monocyte and macrophage numbers in control (n=6) and BAT<sup>ΔΔ</sup> (n=4) mice using flow cytometry.  $p=0,0095$  (left and right). (G) Quantification of surface MHCII expression on EAT monocytes in control (n=14) and Adipo<sup>ΔΔ</sup> mice (n=15) using flow cytometry.  $p=0,9095$ . (H) Quantification of surface CD206 and CD301 expression by EAT macrophages in control (n=11) and Adipo<sup>ΔΔ</sup> (n=16) mice using flow cytometry.  $p=0,6905$  (left and right). (I) Single Cell RNA-Seq analysis of *Mrc1* (CD206) and *Clec10a* (CD301) expression among BAT myeloid cells. (J) Single Cell RNA-Seq analysis of genes involved in cell proliferation.

Panel D represents pooled data from 2 independent experiments. Panels E, G and H represent pooled data from 4 independent experiments. Panel F is representative from 2 independent experiments. All data are represented in means  $\pm$  SEM. Two-tailed Mann Whitney tests were used to determine statistical significance. ns  $p>0,05$  ; \*  $p<0,05$  ; \*\* $<0,01$  ; \*\*\*  $p<0,001$  ; \*\*\*\*  $p<0,0001$ . Source data are provided as a Source Data file.

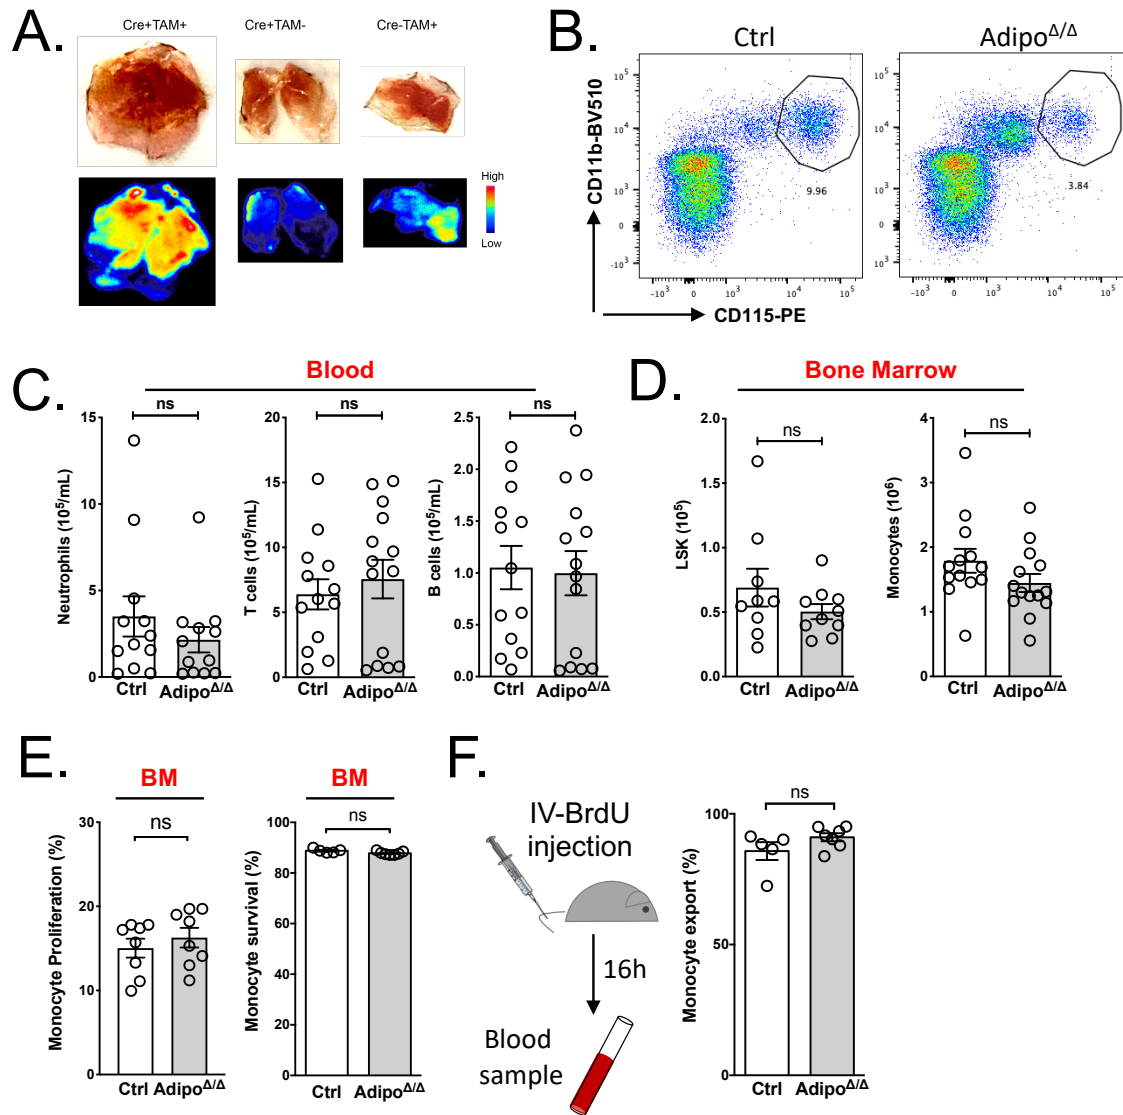

**Figure S3. This figure is related to Figure 3.**

(A) (Top panel) Representative photos showing the enlarged BAT in Adipo $\Delta\Delta$  mice compared to control groups 16 days post-tamoxifen administration. (Bottom panel) Representative autoradiography images showing the increased  $^{64}\text{Cu}$ -DOTA-ECL1i signals in the BAT of Adipo $\Delta\Delta$  mice compared to control groups 16 days post-tamoxifen administration. (B) Representative dot plots of blood monocytes in control and Adipo $\Delta\Delta$  mice. (C) Quantification of blood neutrophil, T cell and B cell counts in control (n=12) and Adipo $\Delta\Delta$  (n=14) mice using flow cytometry.  $p=0,4428$  (left),  $p=0,5826$  (middle),  $p=0,6848$  (right). (D) Quantification of bone marrow LSK (Lin $^-$ Scal $^+$ cKit $^+$ ) and monocytes in control (n=9 and 13 respectively) and Adipo $\Delta\Delta$  (n=10 and 14 respectively) mice using flow cytometry.  $p=0,4002$  (left) and  $p=0,0850$  (right). (E) Bone marrow monocyte proliferation rate and survival in control (n=4 and n=5 respectively) and Adipo $\Delta\Delta$  (n=8 and n=7 respectively) mice by flow cytometry.  $p=0,3144$  (left),  $p=0,0657$  (right). (F) Schematic representation of BrdU injection protocol to visualize monocyte export from bone marrow to blood (left) and its quantification by flow cytometry in control (n=5) and Adipo $\Delta\Delta$  mice (n=7).  $p=0,1490$ .

Panels C and D represent pooled data from 4 independent experiments. Panel E (left) represents pooled data from 2 independent experiments. Panels E (right) and F are representative of one experiment. All data are represented in means  $\pm$  SEM. Two-tailed Mann Whitney tests were used to determine statistical significance. ns  $p>0,05$ ; \*  $p<0,05$ ; \*\*  $p<0,01$ ; \*\*\*  $p<0,001$ ; \*\*\*\*  $p<0,0001$ . Source data are provided as a Source Data file.

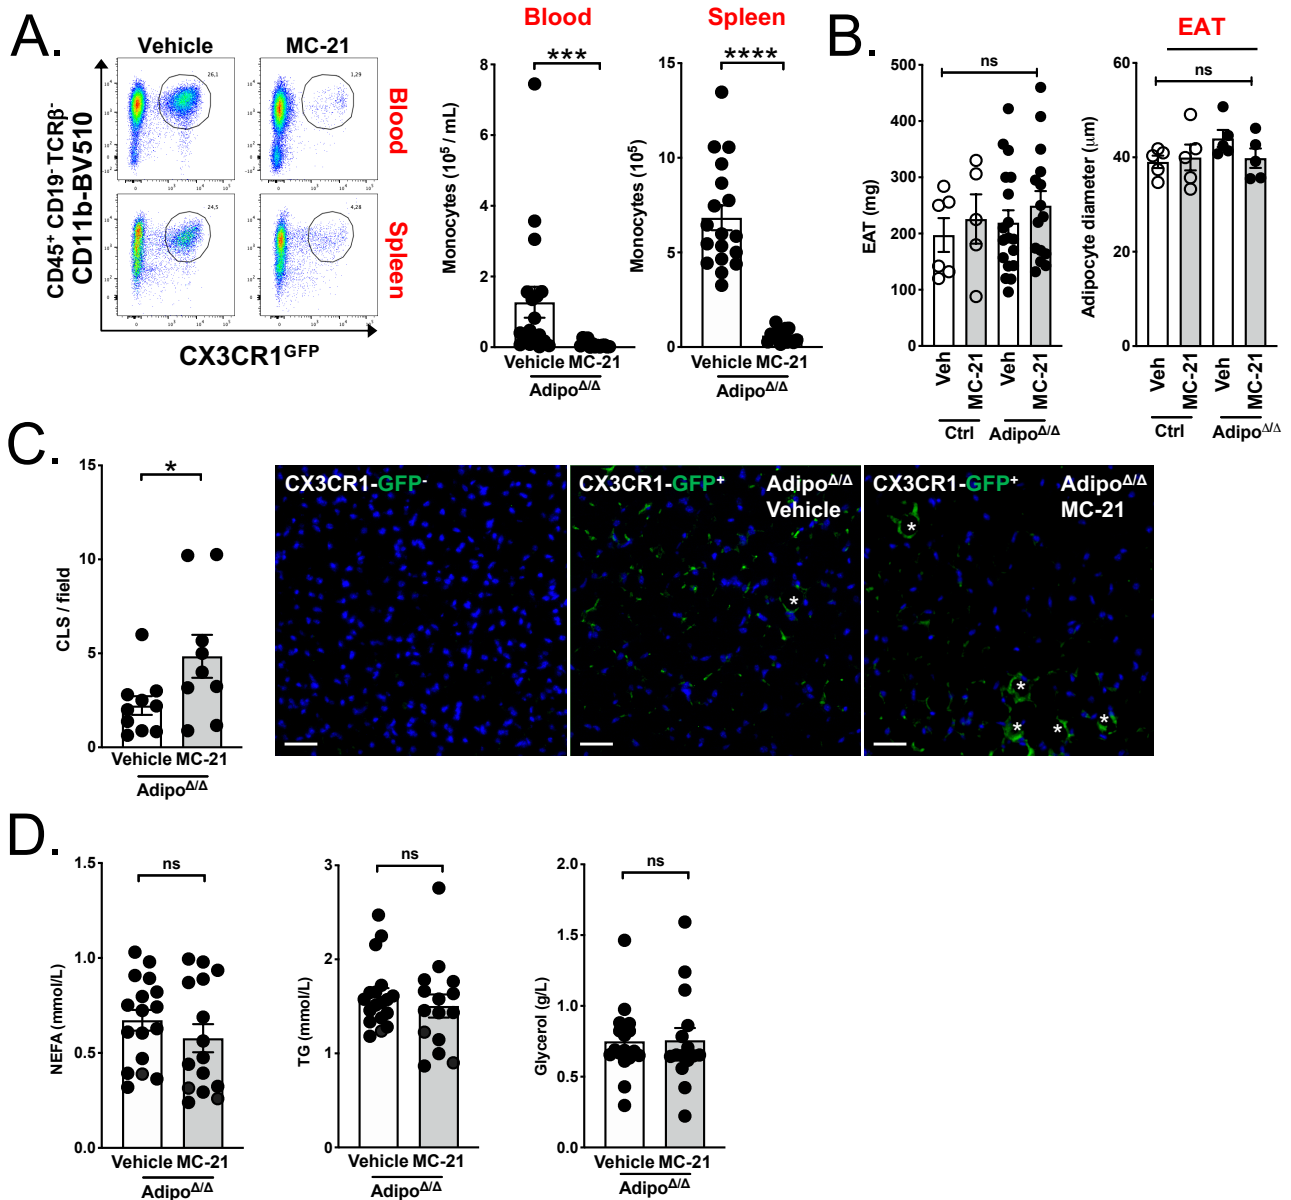

**Figure S4. This figure is related to Figure 4.**

(A) Representative dot plots (left) and quantification (right) of blood and spleen monocytes in MC-21 (n=13 and 15 respectively) or vehicle-treated (n=15 and 18 respectively) *Adipo<sup>ΔΔ</sup>* mice.  $p = 0,0002$  (left) and  $p < 0,0001$  (right). (B) (Left panel) EAT weight of MC-21 or vehicle-treated control (n=5 and 6 respectively) and *Adipo<sup>ΔΔ</sup>* (n=15 and 18 respectively) mice and (right panel) EAT adipocyte diameter measurement.  $p > 0,05$  (all comparisons). (C) Quantification of crown-like structures (CLS) (left) and immunofluorescence microscopy analysis in BAT of control (n=10) and MC-21-treated (n=9) *Adipo<sup>ΔΔ</sup>* mice. *CX3CR1<sup>+/+</sup>* samples were used to determine background signal. White stars indicate crown-like structures. Scale bar = 100um.  $p = 0,0364$ . (D) Glycerol, TG and NEFA levels in the serum of control (n=17) and MC-21-treated (n=15) *Adipo<sup>ΔΔ</sup>* mice.  $p = 0,2948$  (left),  $p = 0,5800$  (middle) and  $p = 0,4474$  (right).

Data were obtained from 3 pooled independent experiments. All data are represented in means  $\pm$  SEM. Two-tailed Mann Whitney tests were used to determine statistical significance. ns  $p > 0,05$ ; \*  $p < 0,05$ ; \*\*  $p < 0,01$ ; \*\*\*  $p < 0,001$ ; \*\*\*\*  $p < 0,0001$ . Source data are provided as a Source Data file.

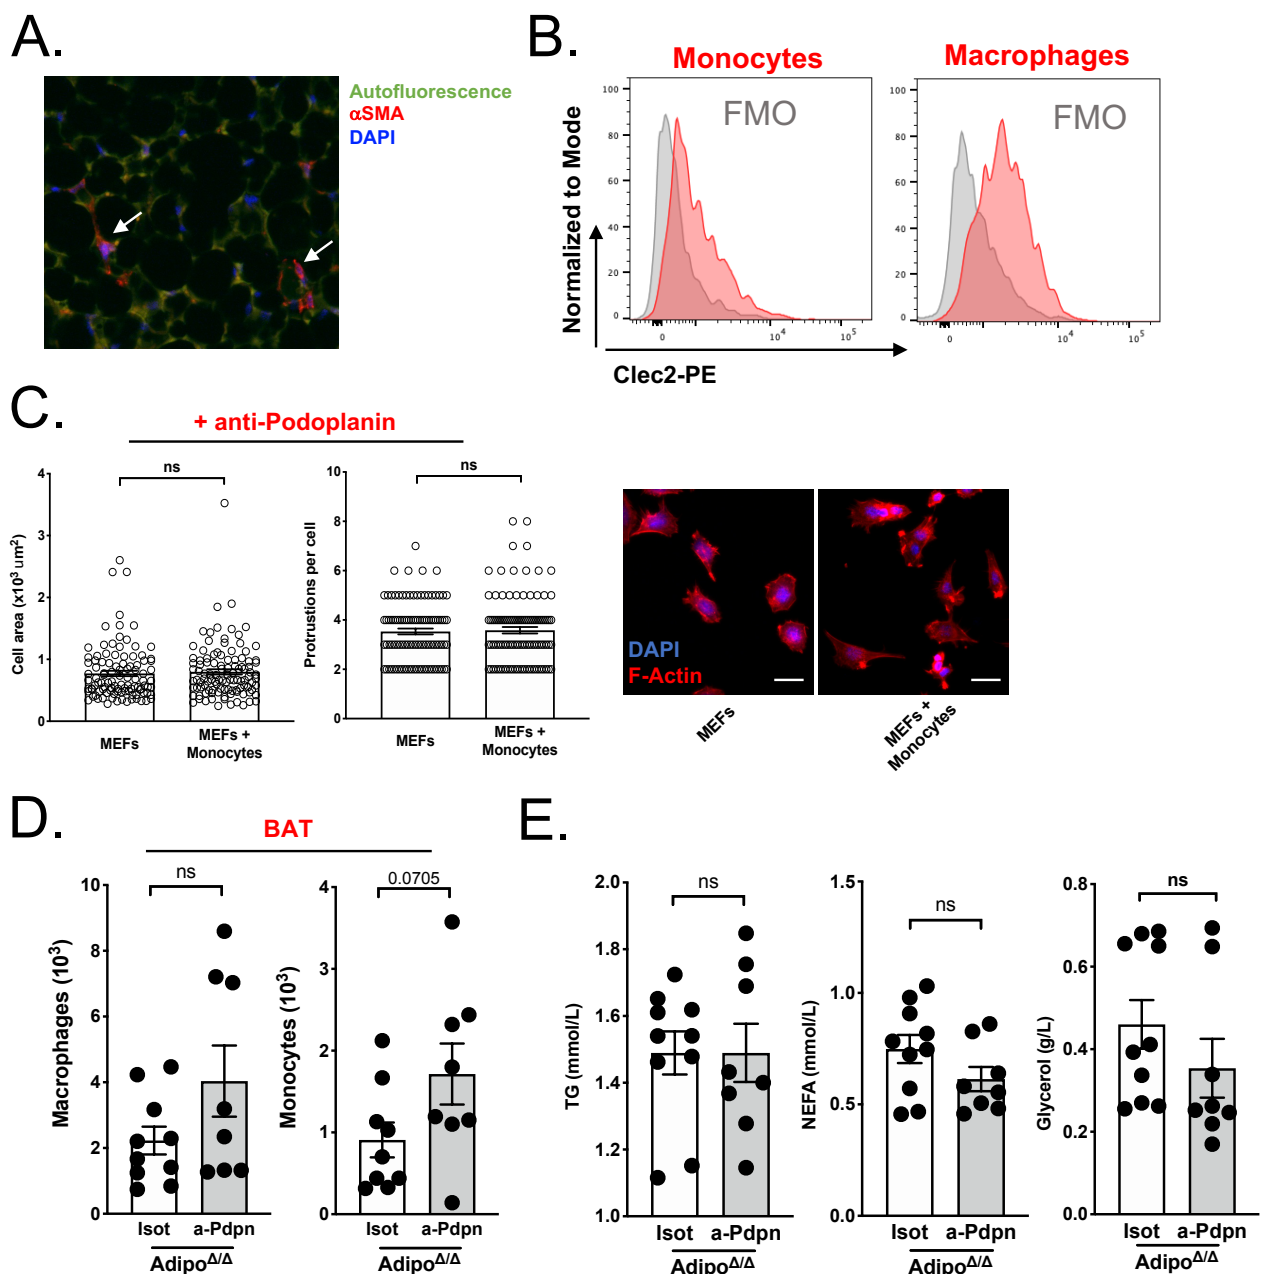

**Figure S5. This figure is related to Figure 5.**

(A)  $\alpha$ -SMA staining (red) in the BAT of  $\text{Adipo}^{\Delta/\Delta}$  mice. Autofluorescence signal (green) is used to show tissue architecture. Data representative of 2 independent experiments. (B) Histograms showing CLEC-2 and FMO stainings among BAT monocytes and macrophages from  $\text{Adipo}^{\Delta/\Delta}$  mice. Data representative of 2 independent experiments. (C) (Left) Quantification of MEF morphological features after a 18hour co-culture experiment with monocytes in the presence of anti-Podoplanin blocking antibody. (Right) Representative images of MEF morphology at the end of the co-culture experiment. Scale bar =  $20\mu\text{m}$ .  $p=0,3784$  (left) and  $p=0,9203$  (right). Data representative of 2 independent experiments. (D) Quantification of BAT macrophage and monocyte numbers in anti-Podoplanin ( $n=8$ ) and isotype control-treated ( $n=10$ )  $\text{Adipo}^{\Delta/\Delta}$  mice using flow cytometry. (E) Glycerol, TG and NEFA levels in the serum of isotype control ( $n=10$ ) and anti-Podoplanin-treated ( $n=8$ )  $\text{Adipo}^{\Delta/\Delta}$  mice. Data were obtained from 2 pooled independent experiments.

Panel C is representative of 2 independent experiments. Panels D and E represent pooled data from 2 pooled independent experiments. All data are represented in means  $\pm$  SEM. Two-tailed Mann Whitney tests were used to determine statistical significance. ns  $p>0,05$ ; \*  $p<0,05$ ; \*\*  $p<0,01$ ; \*\*\*  $p<0,001$ ; \*\*\*\*  $p<0,0001$ . Source data are provided as a Source Data file.

## Supplementary Table 1

Primers used for genotyping and RT-qPCR.

| Mouse          | Genotyping Primer sequences |                         |
|----------------|-----------------------------|-------------------------|
| Gene name      | Primer Forward (Left)       | Primer Reverse (Right)  |
| GAPDH          | ACCACAGTCCATGCCATCACTGCCA   | GGCCATCCACAGTCTTCTGC    |
| $\beta$ -Actin | GAGACCTTCAACACCCC           | GTGGTGGTGAAGCTGTAGGC    |
| CXCL12         | CCAAACTCTCCCCTTCAGAT        | ATTTCTGGGTCAATGCACACT   |
| CCL2           | CATCCACGTGTTGGCTCA          | GATCATCTTGCTGGTGAATGAGT |
| TNF- $\alpha$  | CACAAGATGCTGGGACAGTGA       | TCCTTGATGGTGGTGCATGA    |

| Mouse          | RT-qPCR Primer sequences  |                         |
|----------------|---------------------------|-------------------------|
| Gene name      | Primer Forward (Left)     | Primer Reverse (Right)  |
| GAPDH          | ACCACAGTCCATGCCATCACTGCCA | GGCCATCCACAGTCTTCTGC    |
| $\beta$ -Actin | GAGACCTTCAACACCCC         | GTGGTGGTGAAGCTGTAGGC    |
| CXCL12         | CCAAACTCTCCCCTTCAGAT      | ATTTCTGGGTCAATGCACACT   |
| CCL2           | CATCCACGTGTTGGCTCA        | GATCATCTTGCTGGTGAATGAGT |
| TNF- $\alpha$  | CACAAGATGCTGGGACAGTGA     | TCCTTGATGGTGGTGCATGA    |

## Supplementary Table 2

List of reagents, materials, models and software used.

| Reagent or resource | Source | Identifier |
|---------------------|--------|------------|
|---------------------|--------|------------|

### Antibodies

|                                             |                 |                  |
|---------------------------------------------|-----------------|------------------|
| CD115 PE (clone AFS98)                      | eBioscience     | Cat# 12-1152-82  |
| CD11b Brilliant Violet 510 (cloneM1/70)     | Biologend       | Cat# 101263      |
| Gr1 PerCP-Cy5.5 (clone RB6-8C5)             | BD Biosciences  | Cat# 552093      |
| Ly6C PerCP-Cy5.5 (clone HK1.4)              | Biologend       | Cat# 128011      |
| F4/80 PE-Cy7 (clone BM8)                    | Biologend       | Cat# 123114      |
| CD45 APC-Cy7 (clone 30-F11)                 | BD Biosciences  | Cat# 557659      |
| CD64 Brilliant Violet 421 (clone X54-5/7.1) | Biologend       | Cat# 139309      |
| CD19 FITC (clone 6D5)                       | Biologend       | Cat# 115506      |
| CD301 FITC (clone ER-MP23)                  | Bio-Rad         | Cat# MCA2392     |
| MerTK PE (clone 2B10C42)                    | Biologend       | Cat# 151506      |
| CD11c PE-Cy7 (clone HL3)                    | BD Biosciences  | Cat# 558079      |
| MHC II IA/IE APC (clone M5/114.15.2)        | Biologend       | Cat# 107618      |
| CD206 PerCp-Cy5.5 (clone C068C2)            | Biologend       | Cat# 141715      |
| CD206 AF647 (clone C068C2)                  | Biologend       | Cat# 141712      |
| CD226 PerCp-Cy5.5 (clone10E5)               | Biologend       | Cat# 128813      |
| Clec2 PE (clone 17D9/CLEC-2)                | Biologend       | Cat# 146103      |
| TCR $\beta$ PB (clone H57-597)              | Biologend       | Cat# 109226      |
| CD3 APC (clone 17A2)                        | Biologend       | Cat# 100236      |
| NK1.1 APC (clone PK136)                     | Biologend       | Cat# 108720      |
| Ter119 APC (clone TER-119)                  | Biologend       | Cat# 116212      |
| B220 APC (clone RA3-6B2)                    | BD Biosciences  | Cat# 561226      |
| CD19 APC (clone REA749)                     | Miltenyi Biotec | Cat# 130-111-884 |
| CD150 PE-Cy7 (clone TC15-12F12.2)           | Biologend       | Cat# 115914      |
| Sca1 PB (clone D7)                          | Biologend       | Cat# 108120      |
| c-Kit APC-Cy7 (clone ACK2)                  | eBioscience     | Cat# 47-1172-82  |
| CD48 AF488 (clone HM48-1)                   | Biologend       | Cat# 103414      |



|                                                 |                        |                  |
|-------------------------------------------------|------------------------|------------------|
| CXCR4 APC (clone 2B11)                          | eBioscience            | Cat# 51-9991-80  |
| CD11b APC (clone M1/70)                         | Biologend              | Cat# 101218      |
| MC-21                                           | Dr Mack M.             |                  |
| Podoplanin (clone 8.1.1)                        | BioXCell               | Cat# BE0236      |
| <i>InVivo</i> MAb polyclonal Syrian hamster IgG | BioXCell               | Cat# BE0087      |
| Ly6G Biotin (clone REA526)                      | Miltenyi biotec        | Cat# 130-116-512 |
| CD3 Biotin (clone REA641)                       | Miltenyi biotec        | Cat# 130-123-861 |
| B220 Biotin (clone REA755)                      | Miltenyi biotec        | Cat# 130-110-844 |
| NK1.1 Biotin (clone REA1162)                    | Miltenyi biotec        | Cat# 130-120-513 |
| Ter-119 Biotin (clone Ter-119)                  | Miltenyi biotec        | Cat# 130-120-828 |
| SiglecF Biotin (clone REA798)                   | Miltenyi biotec        | Cat# 130-112-329 |
| $\alpha$ -SMA                                   | Abcam                  | Cat# ab5694      |
| Goat anti Rabbit Cy3                            | Jackson ImmunoResearch | Cat# 111-165-003 |

### Chemicals

|                                         |                    |                  |
|-----------------------------------------|--------------------|------------------|
| DAPI                                    | Sigma              | Cat# D9542       |
| Phalloidin Texas Red                    | Invitrogen         | Cat# T7471       |
| PFA 4%                                  | VWR International  | Cat# 9713.1000   |
| Bovine serum Albumin (BSA)              | Sigma              | Cat# A7030       |
| Tamoxifen                               | Sigma              | Cat# T5648       |
| RPMI medium                             | Life Technologies  | Cat# 21875091    |
| DMEM medium                             | Life Technologies  | Cat# 11960044    |
| Collagenase A                           | Sigma              | Cat# 11088793001 |
| IHC Antigen retrieval solution          | eBiosciences       | Cat# 00-4955-58  |
| ImmunoHistoMount                        | Sigma              | Cat# I1161       |
| Thiazolyl blue tetrazolium bromide      | Sigma              | Cat# M2128       |
| Fetal bovine serum                      | Fisher Scientific  | Cat# 12350273    |
| Lysing buffer                           | BD Biosciences     | Cat# 555899      |
| L-Glutamine                             | Life Technologies  | Cat# 25030024    |
| Penicillin Streptomycin                 | Life Technologies  | Cat# 15070063    |
| Sodium Pyruvate                         | Life Technologies  | Cat# 11360039    |
| Free glycerol reagent                   | Sigma              | Cat# F6428       |
| <i>Power</i> SYBR™ green PCR Master Mix | Applied Biosystems | Cat# 4367659     |
| RIPA buffer                             | Cell signaling     | Cat# 9806        |
| Anti-Biotin MicroBeads                  | Miltenyi Biotec    | Cat# 130-090-858 |

### Critical commercial Assays

|                                                                                         |                          |                           |
|-----------------------------------------------------------------------------------------|--------------------------|---------------------------|
| High-Capacity cDNA reverse transcription kit                                            | Applied Biosystems       | Cat# 4368814              |
| CCL2 DuoSet ELISA                                                                       | R&D Systems              | Cat# DY479-05             |
| TNF-alpha DuoSet ELISA                                                                  | R&D Systems              | Cat# DY410-05             |
| RNeasy Plus Mini Kit (250)                                                              | QIAGEN                   | Cat# 74136                |
| Mouse CXCL12/SDF-1 DuoSet ELISA<br>(Stromal Cell Derived Factor 1), Human,<br>Elisa Kit | R&D Systems<br>EUROMEDEX | Cat# DY460<br>Cat# EH3755 |
| NEFA-HR2 R1 + R2 FUJIFILM                                                               | WAKO                     | Cat# W1W270-77000         |
| Glucose dosage Kit                                                                      | BioSentec                | Cat# 075                  |
| Triglyceride dosage Kit                                                                 | DiaSys                   | Cat#<br>157109910021      |
| BrdU APC Staining Kit                                                                   | ThermoFisher             | Cat# 8817-6600-42         |
| 0.4 $\mu$ m Cell culture Inserts 24 well format                                         | Falcon                   | Cat# 353095               |

**Experimental models: Organisms/Strains**

|                                                                     |                        |                  |
|---------------------------------------------------------------------|------------------------|------------------|
| Mouse: C57BL/6-Tg(Adipoq-cre/ERT2)1Soff/J                           | The Jackson laboratory | JaxStock# 025124 |
| Mouse: B6.FVB-Tg(Ucp1-cre)1Evdr/J                                   | The Jackson laboratory | JaxStock# 024670 |
| Mouse: B6N.129S-Pnpla2 <sup>tm1Eek</sup> /J                         | The Jackson laboratory | JaxStock# 024278 |
| Mouse: B6.129P-Cx3cr1 <sup>tm1Litt</sup> /J                         | The Jackson laboratory | JaxStock# 008451 |
| Mouse: B6.Cg-Gt(ROSA)26Sor <sup>tm9(CAG-tdTomato)Hze</sup> /J       | The Jackson laboratory | JaxStock# 007909 |
| Mouse: C57BL/6NTac-Ccr2 <sup>tm2982</sup> (T2A-Cre7ESR1-T2A-mKate2] | Dr. Burkhard Becher    | N/A              |
| Mouse: CCR2 <sup>GFP</sup>                                          | Dr. Marco Colonna      | N/A              |
| Cell line : Mouse Embryonic Fibroblasts (MEFs)                      | ATCC                   | CRL-2907         |

**Accessories**

|                         |                   |                  |
|-------------------------|-------------------|------------------|
| StepOne                 | Applied Biosystem | N/A              |
| Thermo Cycler SimpliAmp | Applied Biosystem | N/A              |
| Nanodrop                | OZYME             |                  |
| MACS Multistand         | Miltenyi Biotec   | Cat# 130-042-303 |
| MACS LS Columns         | Miltenyi Biotec   | Cat# 130-042-401 |

**Softwares**

|                          |                                                                                   |     |
|--------------------------|-----------------------------------------------------------------------------------|-----|
| Prism6                   | GraphPad                                                                          | N/A |
| FlowJo                   | Tree Star                                                                         | N/A |
| Fuji                     | Fiji                                                                              | N/A |
| GENESys                  | Syngene                                                                           | N/A |
| StepOne Software v.2.2.2 | Applied Biosystem                                                                 | N/A |
| Fiji                     | <a href="https://imagej.net/software/fiji/">https://imagej.net/software/fiji/</a> | N/A |
